# Supplementary material
Source: PubMed Central journal article supplement (PMC1783424)

Patients

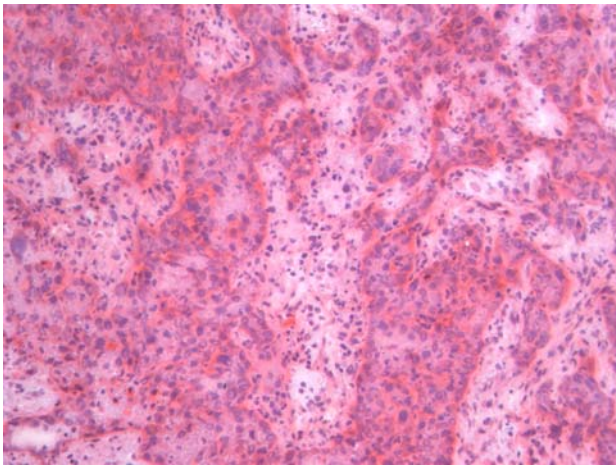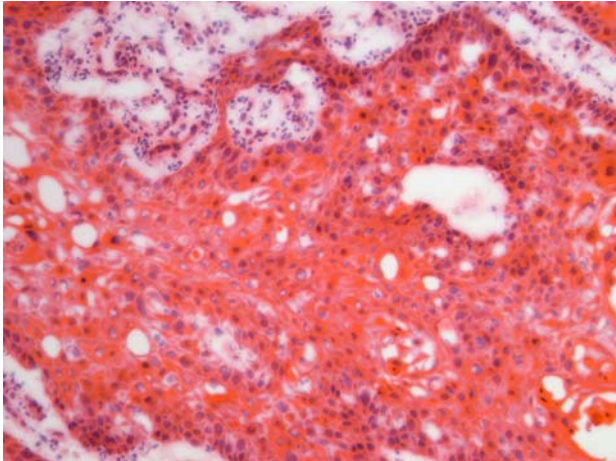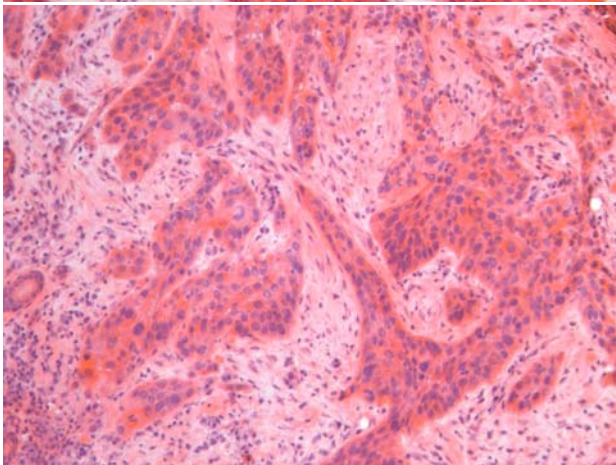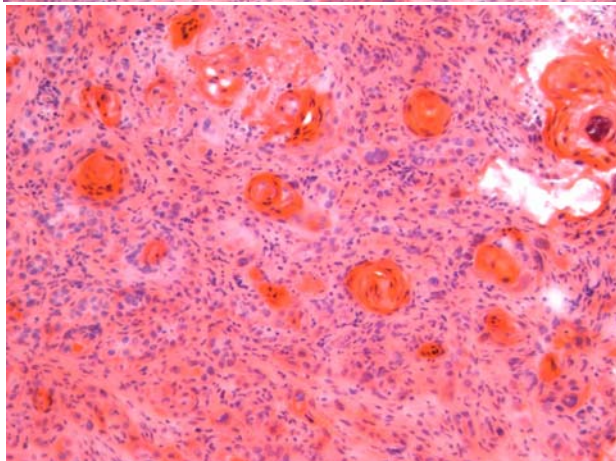

Mice

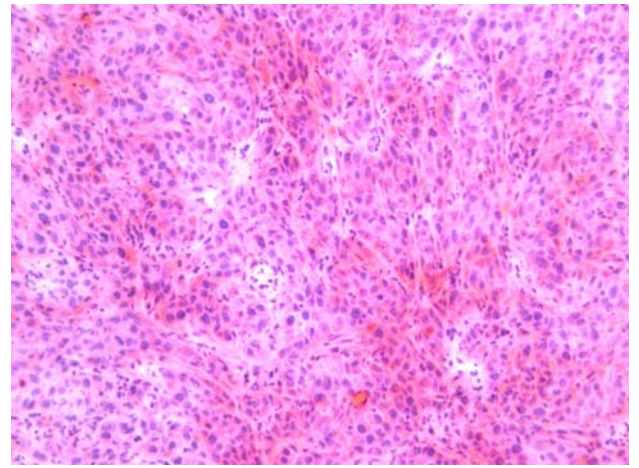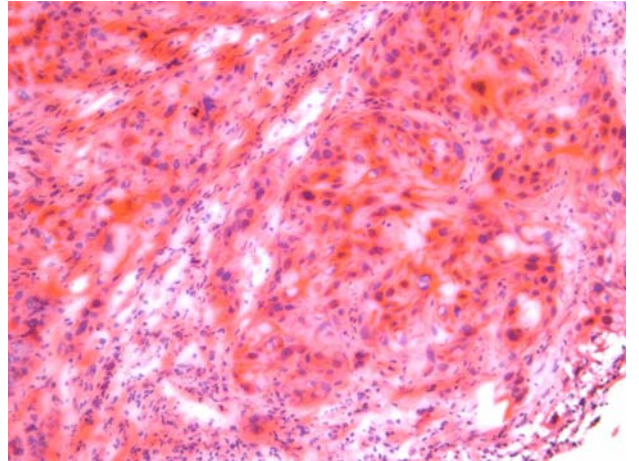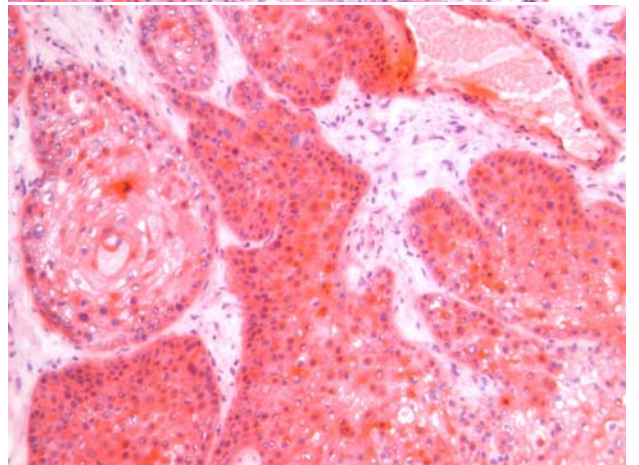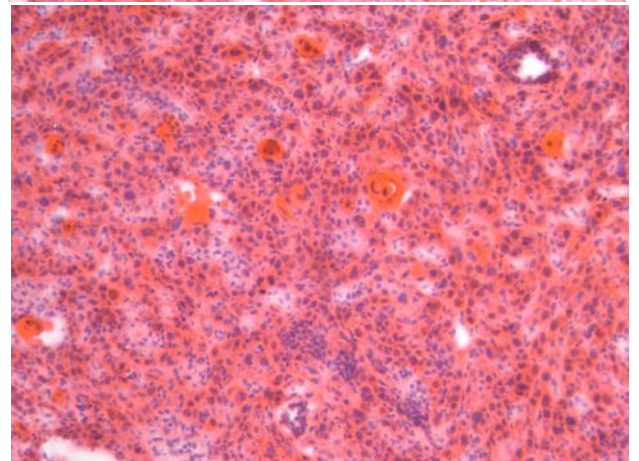

Supplement: pnas_0610117104_1.pdf [file pnas_0610117104_1.pdf]

**A**

CD44

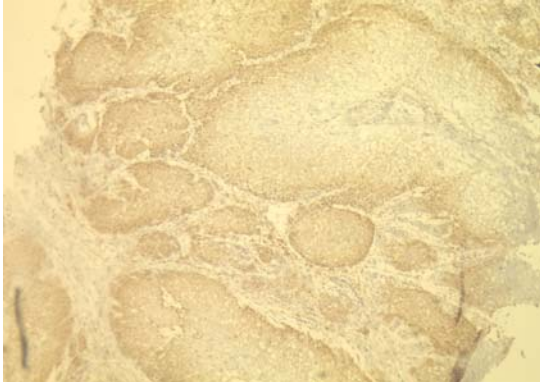

CK5/14

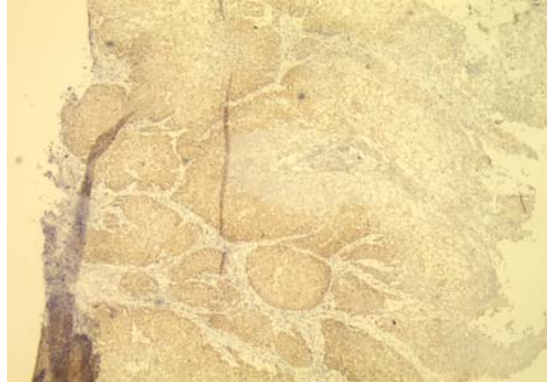

Involucrin

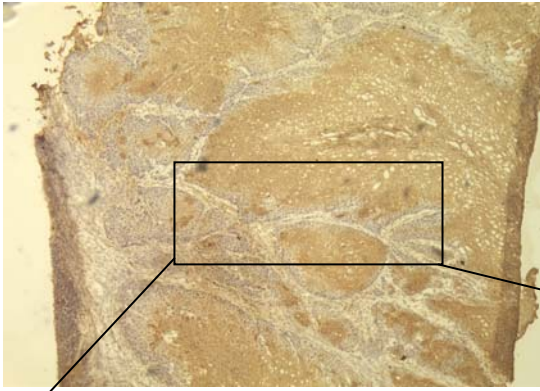

Isotype

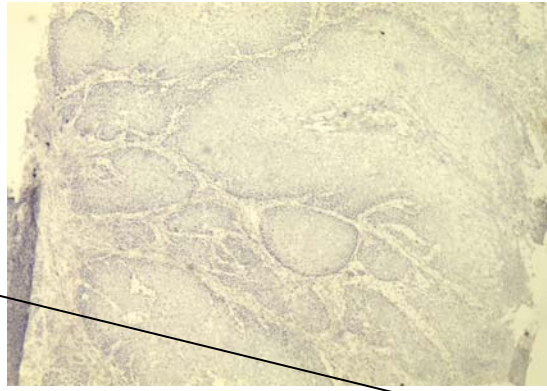

Involucrin

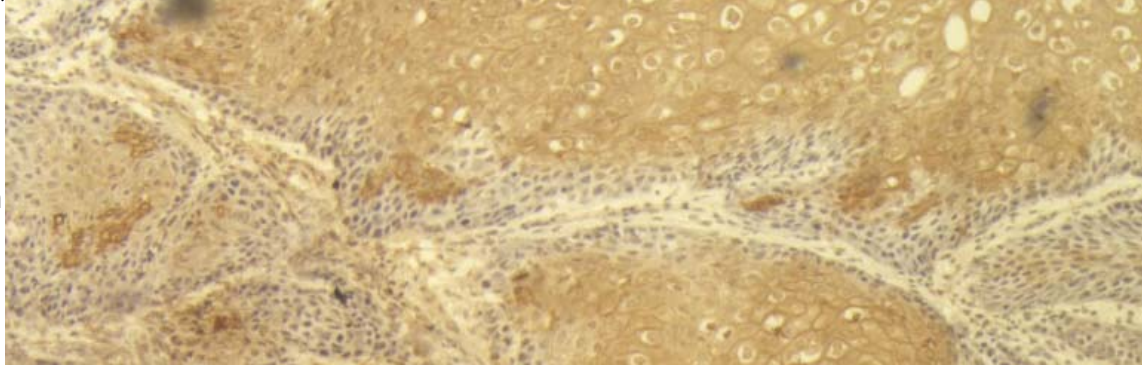

**B**

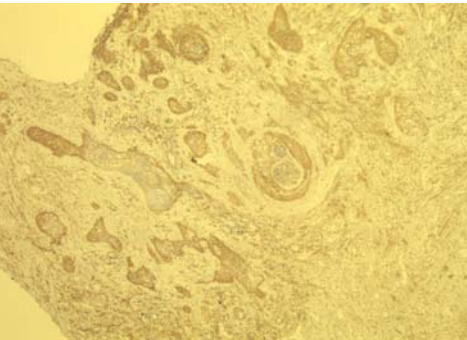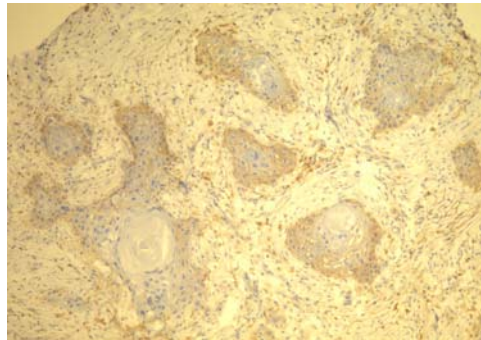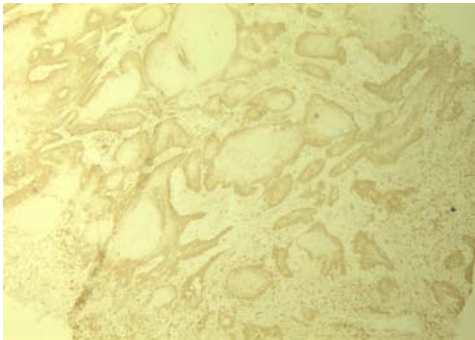

Supplement: pnas_0610117104_2.pdf [file pnas_0610117104_2.pdf]

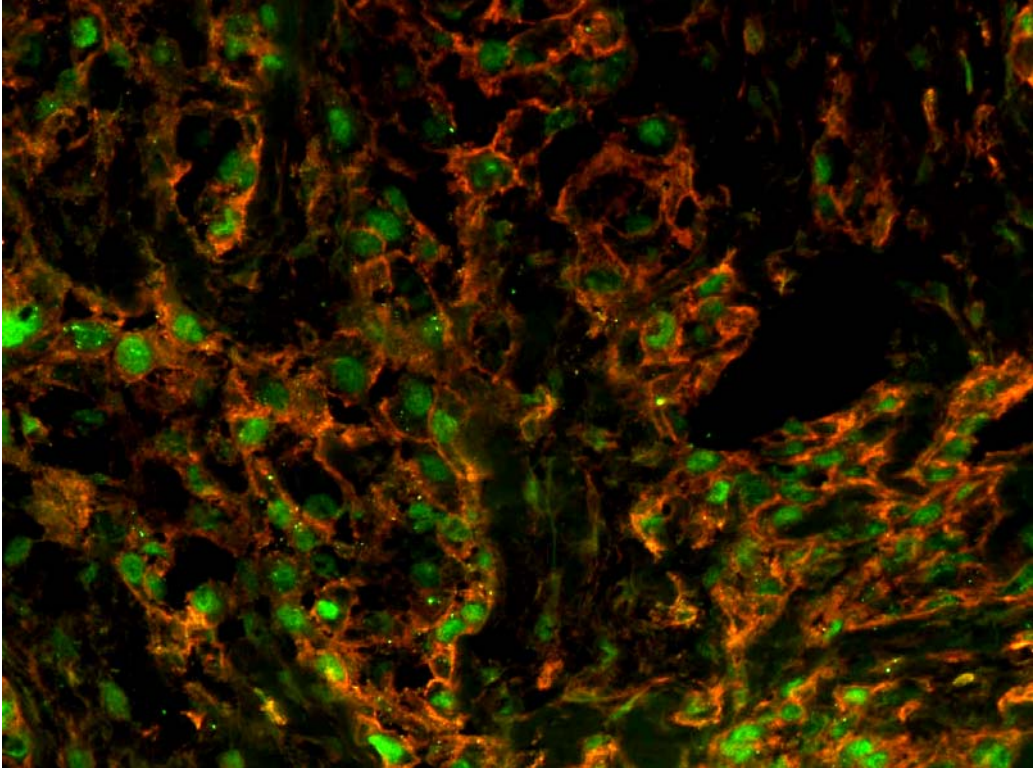

Bmi1/CD44

Supplement: pnas_0610117104_3.pdf [file pnas_0610117104_3.pdf]
